# Supplementary material for: Sophisticated dual-discontinuity periodic bands of poly(nonamethylene terephthalate)
Source: Royal Society of Chemistry journal article supplement (doi:10.1039/d0ce01329c), 2020-12-10
Supplement: d0ce01329c1.pdf [file d0ce01329c1.pdf]

## Sophisticated Dual-Discontinuity Periodic Bands of Poly(nonamethylene terephthalate)

Chien-Hua Tu<sup>a,b</sup>, Eamor M. Woo<sup>a,\*</sup>, Selvaraj Nagarajan<sup>a</sup>, and Graecia Lugito<sup>a,c</sup>

---

<sup>a</sup> Department of Chemical Engineering, National Cheng Kung University No.1, Tainan, 701-01, Taiwan. \*Author to whom correspondence should be addressed. Fax: +886 6 234-4496, e-mail: [emwoo@mail.ncku.edu.tw](mailto:emwoo@mail.ncku.edu.tw) Phone: +886 6 275-7575 x 62670

<sup>b</sup> Chien-Hua Tu ( [y22032582@gmail.com](mailto:y22032582@gmail.com)) is currently associated with Physics at Interfaces Department, Max-Planck Institute for Polymer Research, Ackermannweg 10, D-55128 Mainz, Germany.

<sup>c</sup> Department of Chemical Engineering, Faculty of Industrial Technology, Institut Teknologi Bandung, Jl. Ganesha 10, Bandung 40132, Indonesia.

---

†Electronic Supplementary Information (ESI) available: See DOI: 10.1039/x0xx00000x

\* Author to whom correspondence should be addressed. Fax: +886 6 234-4496, e-mail:

[emwoo@mail.ncku.edu.tw](mailto:emwoo@mail.ncku.edu.tw) Phone: +886 6 275-7575 x 62670

## Supporting Information (SI)

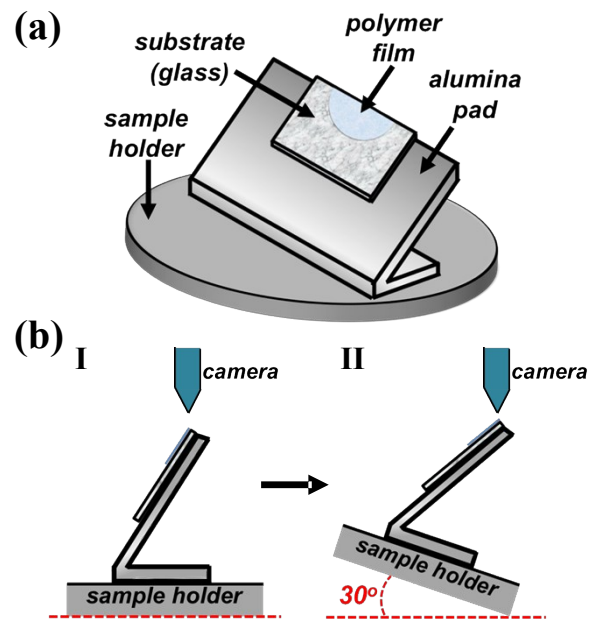

**Fig. S1.** Schematics for set-up of fractured PNT specimens relative to SEM electron beam for correlation between top surface and interior (a) front view, (b) lateral view.

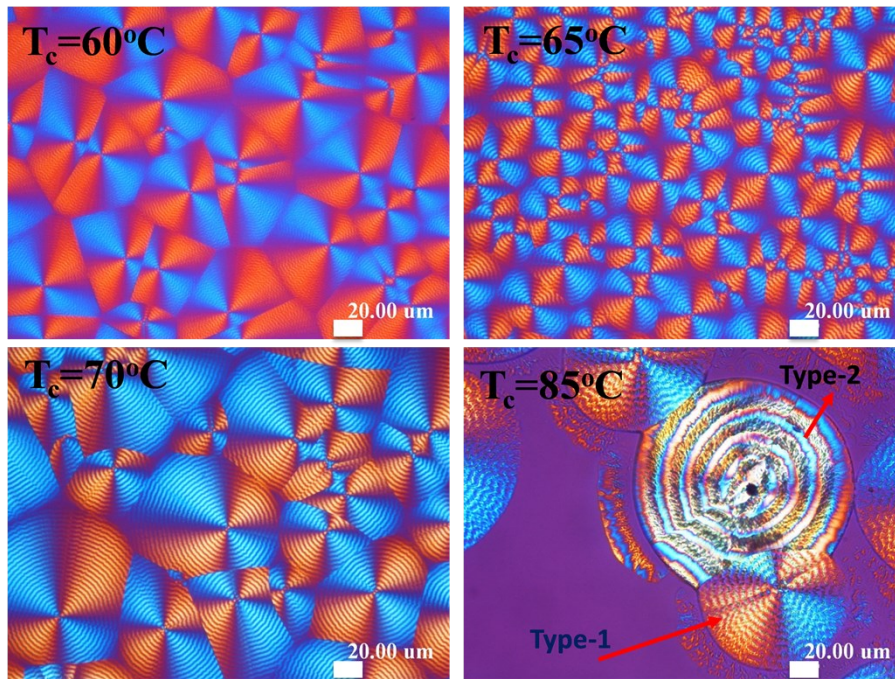

**Fig. S2.** POM micrographs of relative fractional variation of Type-1 vs. Type 2b banded PNT spherulites when crystallized at  $T_c=60$ , 65, 70, and 85°C (as labeled), respectively (quenching from  $T_{max}=120^\circ\text{C}$  after being held for 2 min).

*In-situ growth of Type-1, Type-2a, and Type-2b*

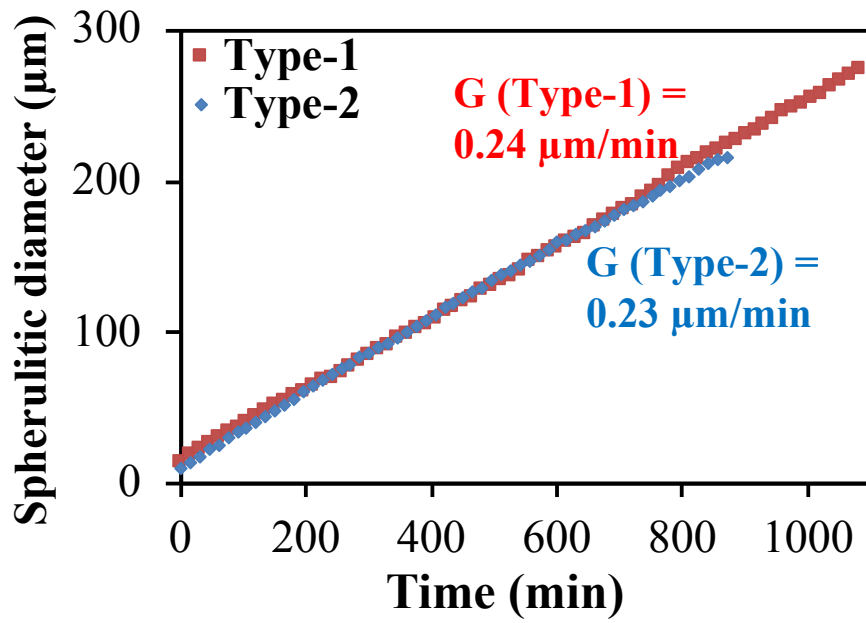

**Fig. S3.** Comparison of growth rates of Type-1 vs. Type-2 banded PNT spherulites crystallized at  $T_c=85^\circ\text{C}$  by quenching from  $T_{\text{max}}=120^\circ\text{C}$  after being held for 2 min. (Incubation time for first initiation of nuclei: ca. 2h at  $T_c=85^\circ\text{C}$ ). Growth recorded only after initiation of the first trace of nuclei in specimens.

*In-situ growth of Type 1 vs. Type-2*

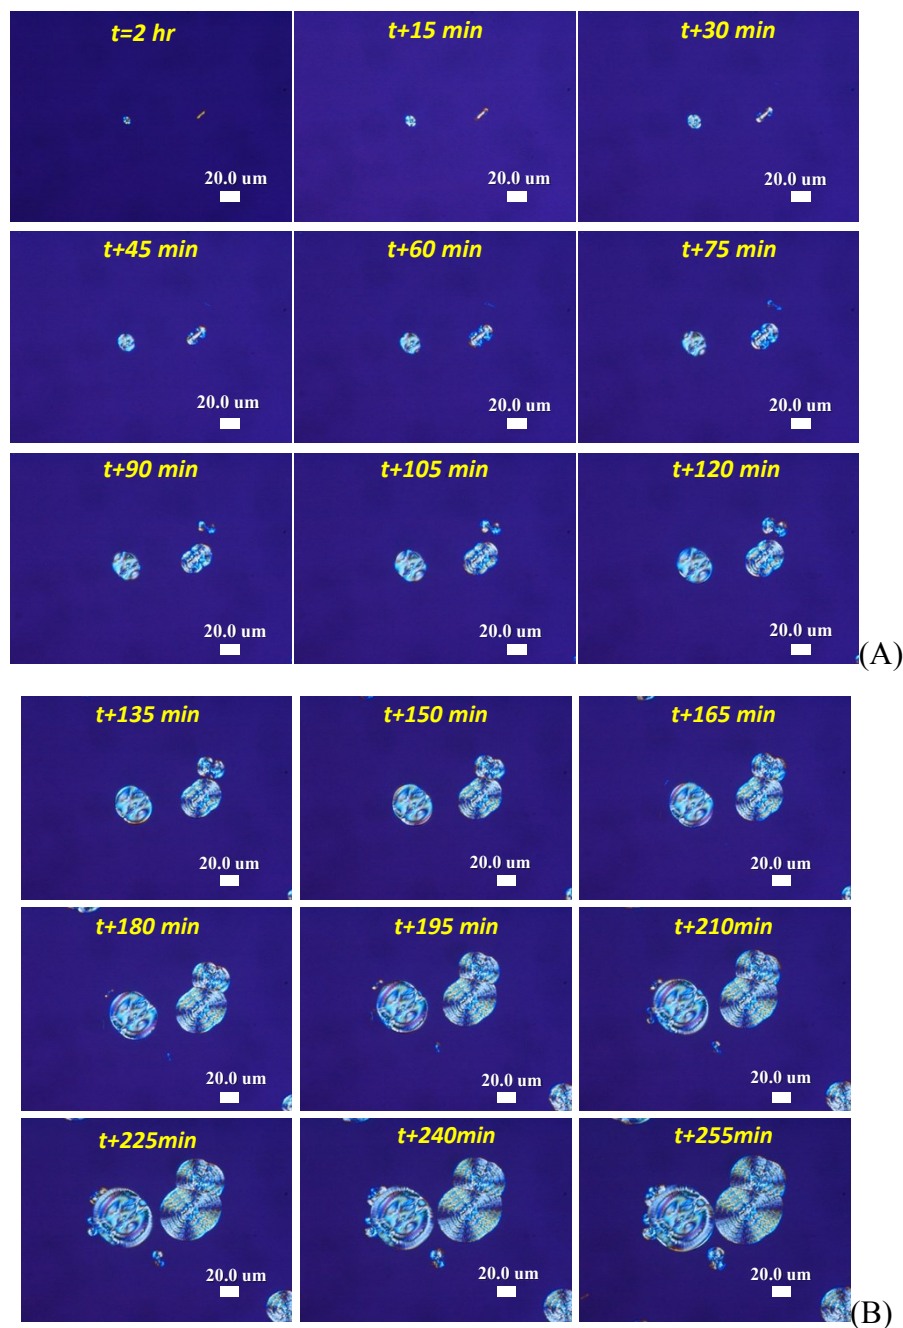

**Fig. S4.** In-situ monitoring of two different shapes and geometries of nuclei of Type-1 (elongated-rod nuclei) vs. Type-2 (well-rounded dot-like nuclei) for growing into banded PTT spherulites at  $T_c=85^\circ\text{C}$ : (A)  $t_0=2\text{ h}$  to  $t_0+120\text{ min}$ ; and (B)  $t_0+135\text{ min}$  to  $t_0+255\text{ min}$ . [Incubation time for first initiation of nuclei: ca. 2h at  $T_c=85^\circ\text{C}$ ]

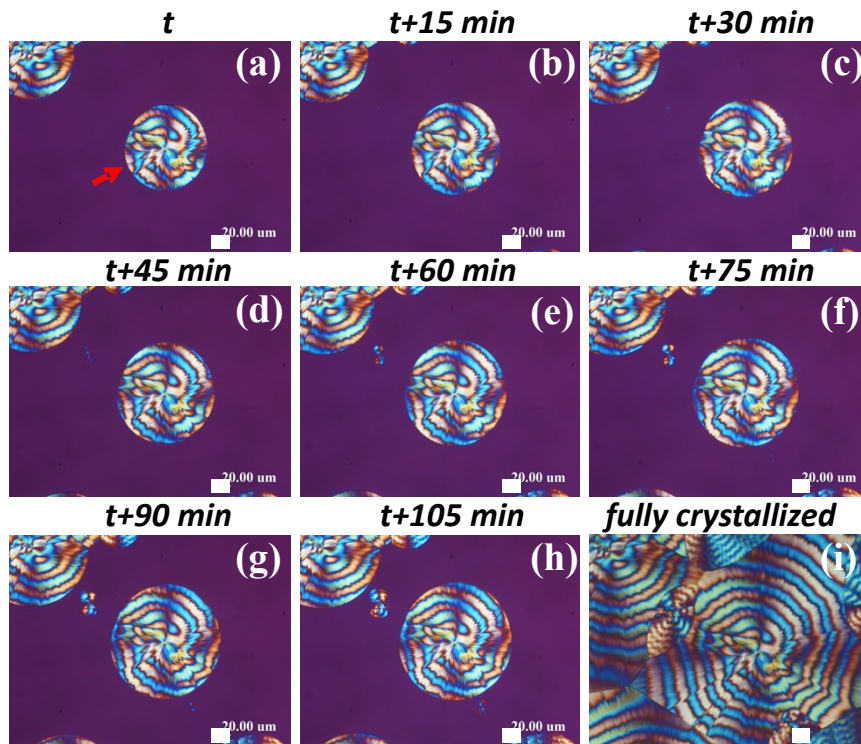

**Fig. S5** In-situ polarized-light optical microscopy images by monitoring only Type-2b (Fermat-spiral ring-banded) PNT spherulites as indicated by red arrow at different times as depicted on each graph (started from  $t_0 = 2$  h. for initiation of nuclei to 17 h for full crystallization completion) at  $T_c=85^\circ\text{C}$  after being quenched from  $T_{\text{max}} = 120^\circ\text{C}$ . (scale bar = 20  $\mu\text{m}$ )
